# Supplementary material
Source: publisher figshare collection journal article supplement (https://acs.figshare.com/ndownloader/files/11054432)
Supplement: Supplementary file 1 [file 11054432]

## Sheet: descriptors-fit
	descriptor	avg	std	type
		(set)	(set)
cations:
1	10/a0 (+)	2.34113	0.65582	Gaussian, a0 is the molecular size as determined using "Volume" option for PM6 semi-empirical method
2	AATS0v (+)	335.141	221.731	2D: averaged Moreau-Broto autocorrelation of lag 0 weighted by van der Waals volume
3	ATSC5se (+)	-0.023115	0.117933	2D: centered Moreau-Broto autocorrelation of lag 5 weighted by Sanderson electronegativities
anions:
4	Ncyano(-)	0.423077	1.1325	number of cyano groups
5	ATS2i (-)	3813.96	1714.13	2D: Moreau-Broto autocorrelation of lag 2 weighted by ionization potential
6	ATSC6Z (-)	0.139288	0.407445	2D: centered Moreau-Broto autocorrelation of lag 6 weighted by atomic number
7	MATS1Z (-)	-0.785654	0.364162	2D: Moran coefficient of lag 1 weighted by atomic number
8	BCUTv-1l (-)	13.6317	0.780933	2D: first lowest eigenvalue of Burden matrix weighted by van der Waals volume
parameters:
10	conc	0.956038	0.375429	molar concentration of salt in MeCN
12	sq.conc	0.955808	0.206024	square root of
Moreau-Broto autocorrelations *				http://www.rguha.net/writing/notes/desc/node2.html
Moran coefficient				http://www.rguha.net/writing/notes/desc/node2.html
Burden matrix				http://www.rguha.net/writing/notes/desc/node3.html
* ATS = autocorrelation of a topological structure
descriptors were calculated using program Mordred					https://jcheminf.springeropen.com/articles/10.1186/s13321-018-0258-y
py source is from					https://github.com/mordred-descriptor/mordred
documentation					http://mordred-descriptor.github.io/documentation/master/index.html
RDKit is a program suit described in					http://www.rdkit.org/docs/Overview.html
py source from					https://github.com/rdkit/rdkit
documentation					http://www.rdkit.org/docs/index.html
					http://www.rdkit.org/Python_Docs/

## Sheet: coefficients-fit
	descriptor	*dens.y1	D.y2	t+.y3	*D+.y4	*D-.y5		avg	std
								(set)	(set)
1	10/a0 (+)	-1.29059	1.98673	3.17181	3.4824	0.456097		2.34113	0.65582		linear term	1
2	AATS0v (+)	-0.168325	-1.63216	-6.43885	-4.58872	1.09337		335.141	221.731		linear term	2
3	Ncyano(-)	0.616249	0.299499	0.190691	0.314319	0.24774		0.423077	1.1325		linear term	3
4	ATS2i (-)	-0.16454	0.503717	-0.352461	0.201669	0.694485		3813.96	1714.13		linear term	4
5	ATSC6Z (-)	0.330119	-0.261103	0.709962	-0.023064	-0.429212		0.139288	0.407445		linear term	5
6	BCUTv-1l (-)	-1.19499	0.860161	-2.50377	-0.01942	1.49503		13.6317	0.780933		linear term	6
7	conc	1.45508	-0.434075	0.186643	-0.98887	0.09408		0.956038	0.375429		linear term	7
8	sq.conc	0.226434	-1.06106	-0.13169	-1.04517	-0.935808		0.955808	0.206024		linear term	8
9	{ATSC5se (+)}^2	0.046139	-0.058092	-0.32029	-0.168495	0.04331		0.014443	0.033186		quadratic term	1
10	{ATSC5se (+)}{ATS2i (-)}	0.43532	0.088216	-0.410257	-0.089228	0.227448		-30.4093	423.912		quadratic term	2
11	{ATSC5se (+)}{ATSC6Z (-)}	-0.121247	0.039833	0.099665	0.075122	0.004641		0.000357	0.008796		quadratic term	3
12	{10/a0.G98 (+)}{MATS1Z (-)}	-1.31977	0.536468	4.27767	2.53979	-1.23584		-1.8438	0.936392		quadratic term	4
13	{AATS0v (+)}{MATS1Z (-)}	-0.657438	0.280331	-4.80563	-1.7772	1.99188		-266.411	205.259		quadratic term	5
14	{ATSC5se (+)}{MATS1Z (-)}	0.232077	0.153225	-0.393929	-0.015658	0.276683		0.012856	0.100404		quadratic term	6
15	{Ncyano(-)}{MATS1Z (-)}	-0.679557	0.363209	-1.0412	0.067052	0.567345		-0.004269	0.481351		quadratic term	7
16	{ATS2i (-)}{conc}	1.0714	-0.671579	0.330362	-0.300705	-0.898874		3696.58	2514.75		quadratic term	8
17	{MATS1Z (-)}{conc}	2.52613	-1.78243	0.52401	-1.91274	-1.43862		-0.73394	0.475219		quadratic term	9
18	{AATS0v (+)}{sq.conc}	0.013116	0.123684	0.64565	0.669442	-0.3562		324.254	241.104		quadratic term	10
	Y (avg)	1.014	16.2235	0.4948	7.9553	8.2682
	Y (std)	0.0824	5.5647	0.0573	2.7507	3.2374
Comments:
shifted values:
(Y-Y(avg))/Y(std) => y
(X-X(avg))/X(std) => x
avg - set average
std - set standard deviation
y=beta * x

## Sheet: residuals-fit
compound	*conc	*sq.conc		*dens.y1	fit	res		D.y2	fit	res		*D+.y4	fit	res		*D-.y5	fit	res
set				density, g/cm3				joint diffusivity, x1e-6 cm2/s				cation diffusivity				anion diffusivity
[C2mim+][DCA-]	1.12	1.058		0.957	0.94	0.0171		28.12	27.214	0.9058		10.123	9.824	0.2991		17.997	17.39	0.6068
[C2mim+][B(CN)4-]	1.101	1.049		0.934	0.934	0		22.47	22.999	-0.529		10.269	10.902	-0.6335		12.201	12.097	0.1045
[P14+][B(CN)4-]	1.061	1.03		0.987	0.968	0.0192		22.274	21.002	1.2724		10.068	8.95	1.1174		12.206	12.051	0.1551
[P14+][DCA-]	0.949	0.974		0.933	0.947	-0.0143		23.998	24.7	-0.7021		8.999	9.225	-0.2261		14.999	15.475	-0.476
[N112(C2H4OMe)+][B(CN)4-]	1.14	1.068		0.941	0.937	0.0036		18.917	18.701	0.2156		8.626	8.493	0.1327		10.291	10.208	0.0829
[N1111+][TFSI-]	1.073	1.036		1.055	1.054	0.0013		19.28	19.354	-0.0736		10.835	11.148	-0.313		8.445	8.205	0.2394
[PyOc+][B(CN)4-]	0.993	0.996		0.927	0.946	-0.0193		20.03	20.738	-0.7081		7.031	7.557	-0.5267		12.999	13.181	-0.1814
[N2222+][PF6-]	0.974	0.987		0.982	1.023	-0.041		19.54	18.428	1.1121		9.614	9.307	0.3065		9.926	9.121	0.8056
[S222+][TFSI-]	1.029	1.015		1.059	1.063	-0.0037		17.28	16.428	0.8517		9.971	9.386	0.585		7.309	7.043	0.2666
[N2222+][TFSI-]	1.055	1.027		1.068	1.074	-0.0062		16.58	15.957	0.6232		8.605	9.091	-0.4858		7.975	6.866	1.109
[C4mim+][PF6-]	1.018	1.009		0.99	0.994	-0.0036		17.179	16.73	0.4489		8.985	8.349	0.6355		8.194	8.381	-0.1866
[PyEt+][TFSI-]	1.172	1.083		1.104	1.091	0.0131		14.24	14.253	-0.0129		8.928	8.043	0.8853		5.312	6.21	-0.8981
[4MePyBu+][BF4-]	0.994	0.997		0.981	0.951	0.0297		16.6	17.14	-0.5402		8.449	8.231	0.2185		8.151	8.909	-0.7587
[C2mim+][TFSI-]	1.065	1.032		1.055	1.061	-0.0059		15.31	15.849	-0.5391		9.048	9.01	0.0385		6.262	6.839	-0.5776
[HN222+][TFSI-]	1.015	1.008		1.056	1.064	-0.008		15.81	16.568	-0.7585		9.233	9.493	-0.2604		6.577	7.075	-0.498
[4MePyBu+][PF6-]	0.946	0.973		1.015	0.984	0.0311		16.86	17.367	-0.5067		8.514	8.664	-0.15		8.346	8.702	-0.3567
[N2222+][BF4-]	0.814	0.902		0.909	0.933	-0.0244		18.78	18.188	0.5918		10.536	10.001	0.5346		8.244	8.187	0.0572
[MeImBz+][PF6-]	0.968	0.984		1.048	1.025	0.0229		15.55	15.36	0.1903		7.806	7.681	0.1256		7.744	7.679	0.0647
[C4mim+][BF4-]	0.859	0.927		0.964	0.951	0.0132		17.411	17.286	0.1253		8.914	8.682	0.2322		8.497	8.603	-0.1069
[MeImBz+][BF4-]	0.935	0.967		0.96	0.949	0.0111		15.46	14.849	0.6115		7.668	7.804	-0.1358		7.792	7.045	0.7473
[Li+][BF4-]	1.138	1.067		0.959	0.973	-0.014		12.62	13.714	-1.0942		6.07	6.304	-0.2342		6.55	7.41	-0.8601
[P14+][TFSI-]	1.003	1.002		1.03	1.065	-0.0353		13.992	14.319	-0.3268		8.017	8.206	-0.1889		5.975	6.112	-0.1378
[N3333+][BF4-]	0.814	0.902		0.946	0.955	-0.0091		17.2	17.306	-0.1059		7.912	8.503	-0.5905		9.288	8.803	0.4846
[di(MeO)Im+][PF6-]	0.78	0.883		1.035	1.015	0.0199		17.713	20.051	-2.3381		8.927	10.1	-1.1722		8.786	9.951	-1.1658
[Li+][FSI-]	0.921	0.959		0.998	1.004	-0.0061		15	14.511	0.4893		6.75	6.671	0.0789		8.25	7.84	0.4104
[MeImBz+][TFSI-]	1.092	1.045		1.09	1.087	0.0027		12.26	12.225	0.0354		5.971	6.847	-0.8763		6.289	5.378	0.9117
[Li+][DFOB-]	0.908	0.953		0.938	0.951	-0.013		14.29	13.174	1.1161		6.388	6.272	0.1159		7.902	6.902	1.0002
[PyBz+][TFSI-]	1.018	1.009		1.096	1.096	0		12.252	11.01	1.2424		6.898	5.853	1.0452		5.354	5.157	0.1972
[N4444+][PF6-]	0.766	0.875		0.945	0.957	-0.0122		13.9	14.691	-0.7913		6.338	6.857	-0.5186		7.562	7.834	-0.2727
[Li+][CTf3-]	1.011	1.005		1.169	1.159	0.0098		12.03	12.553	-0.5232		6.099	6.228	-0.1288		5.931	6.325	-0.3944
[PyBz+][PF6-]	0.74	0.86		1.032	1.039	-0.0066		16.23	14.457	1.7731		8.294	6.988	1.3058		7.936	7.469	0.4673
[N4444+][BF4-]	0.811	0.9		0.959	0.978	-0.0188		14.727	14.159	0.5682		6.303	5.989	0.3146		8.424	8.17	0.2535
[Li+][TDI-]	0.853	0.923		0.968	0.978	-0.01		13.78	14.486	-0.7055		7.455	7.708	-0.2528		6.325	6.778	-0.4527
[Li+][TfO-]	0.998	0.999		0.992	0.973	0.0192		11.37	12.94	-1.5702		5.537	6.071	-0.5335		5.833	6.87	-1.0367
[Li+][CF3CO2-]	1.005	1.003		0.925	0.915	0.0104		10.47	10.207	0.2631		5.151	5.043	0.1083		5.319	5.164	0.1548
[Li+][BETI-]	0.884	0.94		1.114	1.1	0.0139		11.67	11.607	0.0627		6.442	6.324	0.1174		5.228	5.283	-0.0547
[4CNPyBz+][TFSI-]	0.958	0.979		1.097	1.086	0.0107		10.467	11.596	-1.1291		5.38	6.171	-0.7905		5.087	5.426	-0.3386
[4CNPyBz+][PF6-]	0.86	0.927		1.071	1.05	0.0214		11.598	13.504	-1.9059		5.405	6.457	-1.0522		6.193	7.047	-0.8537
[Li+][BOB-]	0.73	0.854		0.957	0.961	-0.0038		13.67	13.853	-0.1831		6.616	6.729	-0.1123		7.054	7.125	-0.0708
[N4444+][TFSI-]	0.902	0.95		1.058	1.051	0.0065		10.03	9.756	0.2736		4.895	4.838	0.057		5.135	4.919	0.2166
[Li+][PF6-]	0.526	0.725		0.992	1.003	-0.0115		15.92	18.039	-2.1194		6.575	7.848	-1.2727		9.345	10.192	-0.8467
[N1111+][PF6-]	0.12	0.346		0.887	0.9	-0.0131		34.26	33.959	0.3009		17.815	17.787	0.0284		16.445	16.172	0.2726
[N1111+][BF4-]	0.1	0.316		0.927	0.908	0.0185		30.65	30.598	0.0516		17.501	17.333	0.1677		13.149	13.265	-0.1162
[Li+][TFSI-]	0.89	0.944		1.076	1.044	0.0321		15.84	14.1	1.7395		7.888	6.576	1.3123		7.952	7.524	0.4272
[Li+][TFSI-]	1.602	1.266		1.142	1.157	-0.0146		8.516	8.454	0.0624		3.96	4.184	-0.2242		4.556	4.27	0.2865
[Li+][TFSI-]	2.496	1.58		1.289	1.29	-0.0007		3.182	3.787	-0.6051		1.642	2.001	-0.3592		1.54	1.786	-0.2459
[Li+][TFSI-]	2.093	1.447		1.231	1.23	0.0005		6.008	5.661	0.3467		3.268	2.908	0.3608		2.74	2.754	-0.0141
[Li+][TFSI-]	1.106	1.051		1.066	1.079	-0.013		14.259	12.137	2.1216		6.103	5.766	0.3371		8.156	6.372	1.7845
[Li+][TFSI-]	0.741	0.861		1.008	1.019	-0.0109		15.403	15.701	-0.2983		7.547	7.218	0.329		7.856	8.483	-0.6273
[Li+][TFSI-]	0.35	0.591		0.942	0.948	-0.0063		22.466	21.303	1.1631		9.705	9.378	0.327		12.761	11.925	0.8361
[Li+][TFSI-]	0.147	0.384		0.907	0.905	0.0016		25.88	26.005	-0.1245		11.128	11.107	0.0217		14.752	14.898	-0.1462
[N2222+][BzNNN-]	1.07	1.034		0.959	0.963	-0.0045		14.28	14.648	-0.3675		7.468	7.568	-0.0998		6.812	7.079	-0.2677

## Sheet: all descriptors
salts set	SMILEs	mol_volume.G98(+)	10/a0.G98 (+)	PMI1.coord.G98(+)	NPR1.coord.G98(+)	eccentricity.coord.G98(+)	asphericity.coord.G98(+)	spherosity.coord.G98(+)	PMI3.mass.G98(+)	TPSA(+)	NumHAcceptors(+)	NumAromaticRings(+)	Chi2v(+)	NPR2(+)	Hato(+)	nN (+)	ATS4dv (+)	ATS6d (+)	AATS0Z (+)	AATS0v (+)	ATSC1c (+)	ATSC2c (+)	ATSC3c (+)	ATSC4c (+)	ATSC5c (+)	ATSC6c (+)	ATSC7c (+)	ATSC1dv (+)	ATSC2dv (+)	ATSC3dv (+)	ATSC4dv (+)	ATSC5dv (+)	ATSC6dv (+)	ATSC7dv (+)	ATSC8dv (+)	ATSC1d (+)	ATSC2d (+)	ATSC3d (+)	ATSC4d (+)	ATSC5d (+)	ATSC6d (+)	ATSC7d (+)	ATSC8d (+)	ATSC1Z (+)	ATSC2Z (+)	ATSC3Z (+)	ATSC4Z (+)	ATSC5Z (+)	ATSC7Z (+)
[C2mim+][DCA-]	C1=[N+](C=C[N]1CC)C C(#N)[N-]C#N	166.196	2.02	0.516	0.097	0.995	0.651	0.216	3.434	8.81	1	1	1.106	0.874	1.416	2	9	15	17.105	177.35	-0.131	-0.013	0.03	-0.004	0.006	-0.009	-0.004	23.421	0.244	-40.681	-28.601	-3.875	13.163	12.066	0	3.842	-1.097	-5.776	-4.742	-0.798	2.659	1.596	0	11.158	8.41	-66.404	-49.607	-19.094	43.978
[C2mim+][B(CN)4-]	C1=[N+](C=C[N]1CC)C C(#N)[B-](C#N)(C#N)C#N	166.196	2.02	0.516	0.097	0.995	0.651	0.216	3.434	8.81	1	1	1.106	0.874	1.416	2	9	15	17.105	177.35	-0.131	-0.013	0.03	-0.004	0.006	-0.009	-0.004	23.421	0.244	-40.681	-28.601	-3.875	13.163	12.066	0	3.842	-1.097	-5.776	-4.742	-0.798	2.659	1.596	0	11.158	8.41	-66.404	-49.607	-19.094	43.978
[P14+][B(CN)4-]	C1CCC[N+]1(C)CCCC C(#N)[B-](C#N)(C#N)C#N	249.143	1.789	1.043	0.207	0.978	0.43	0.388	4.026	0	0	0	1.506	0.855	1.333	1	22	64	13.1	155.888	-0.027	-0.131	0.068	0.085	-0.036	-0.042	-0.01	10	-9.333	-22.222	-1.111	-1.667	-4	6.667	5.333	4	-4.333	-6.889	-1.111	-1.667	0	2.333	1.333	9.9	-17	-114.25	-9.22	30.31	27.71
[P14+][DCA-]	C1CCC[N+]1(C)CCCC C(#N)[N-]C#N	249.143	1.789	1.043	0.207	0.978	0.43	0.388	4.026	0	0	0	1.506	0.855	1.333	1	22	64	13.1	155.888	-0.027	-0.131	0.068	0.085	-0.036	-0.042	-0.01	10	-9.333	-22.222	-1.111	-1.667	-4	6.667	5.333	4	-4.333	-6.889	-1.111	-1.667	0	2.333	1.333	9.9	-17	-114.25	-9.22	30.31	27.71
[N112(C2H4OMe)+][B(CN)4-]	C[N+](C)(CC)CCOC C(#N)[B-](C#N)(C#N)C#N	189.518	1.946	1.13	0.236	0.972	0.468	0.46	3.813	9.23	1	0	1.099	0.948	1.317	1	30	33	14.185	147.549	-0.056	-0.228	0.166	0.072	-0.158	0.013	0.018	11.896	-27.447	-15.004	15.35	-14.527	-13.815	12.017	4.938	3.007	-6.743	-3.893	0.424	-1.267	0.259	2.016	0.605	5.728	-8.914	-130.259	4.148	67.926	41.481
[N1111+][TFSI-]	C[N+](C)(C)C [S](=O)(=O)([N-][S](=O)(=O)C(F)(F)F)C(F)(F)F	140.529	2.128	1.299	1	0	0	1	0.752	0	0	0	0.671	1	1.283	1	0	0	12.059	135.905	-0.01	-0.129	0.009	0.048	0	0	0	4.484	-15.592	-8.969	11.958	0	0	0	0	-1.619	-5.419	1.121	1.682	0	0	0	0	-1.633	18.291	-191.087	126.311	0	0
[PyOc+][B(CN)4-]	C1=CC=[N+](C=C1)CCCCCCCC C(#N)[B-](C#N)(C#N)C#N	288.589	1.712	0.905	0.051	0.999	0.89	0.137	16.922	3.88	0	1	1.796	0.996	1.385	1	52	120	14.972	178.691	-0.017	-0.015	0.102	0.038	-0.014	-0.035	-0.046	15.611	-2.519	1.611	-7.185	-0.324	-1.019	-1.713	-4.407	2.389	-2.185	-0.389	-1.019	0.12	0.093	0.065	-0.963	6.056	-67.227	-7.181	-17.824	3.03	1.35
[N2222+][PF6-]	C([N+](CC)(CC)CC)C [P-](F)(F)(F)(F)(F)F	205.004	1.898	1.839	0.645	0.764	0.069	0.845	2.045	0	0	0	1.118	1	1.303	1	6	54	12.31	146.659	-0.045	-0.096	0.049	0.017	-0.013	0.002	0	13.213	-3.149	-26.911	-26.19	13.013	16.438	0	0	6.873	-5.337	-13.184	-3.446	6.293	3.146	0	0	-1.413	6.143	-13.741	-194.59	-13.784	0
[S222+][TFSI-]	C([S+](CC)CC)C [S](=O)(=O)([N-][S](=O)(=O)C(F)(F)F)C(F)(F)F	179.08	1.976	0.587	0.181	0.984	0.33	0.249	1.972	0	0	0	1.837	0.551	1.307	0	3	27	22.136	163.824	0.002	-0.009	0.002	-0.018	-0.004	0.008	0	-3.065	1.913	0.075	-11.965	2.369	5.094	0	0	2.994	-2.486	-5.857	-1.767	2.789	1.395	0	0	50.362	-58.419	-183.316	-104.907	41.839	0
[N2222+][TFSI-]	C([N+](CC)(CC)CC)C [S](=O)(=O)([N-][S](=O)(=O)C(F)(F)F)C(F)(F)F	205.004	1.898	1.839	0.645	0.764	0.069	0.845	2.045	0	0	0	1.118	1	1.303	1	6	54	12.31	146.659	-0.045	-0.096	0.049	0.017	-0.013	0.002	0	13.213	-3.149	-26.911	-26.19	13.013	16.438	0	0	6.873	-5.337	-13.184	-3.446	6.293	3.146	0	0	-1.413	6.143	-13.741	-194.59	-13.784	0
[C4mim+][PF6-]	C1=[N+](C=C[N]1CCCC)C [P-](F)(F)(F)(F)(F)F	226.762	1.842	0.738	0.084	0.996	0.77	0.206	6.719	8.81	1	1	1.356	0.953	1.395	2	33	53	16.04	173.641	-0.113	-0.024	0.072	0.02	-0.015	-0.026	-0.026	24.6	4.152	-24.554	-18.875	-15.898	-13.547	-3.077	9.984	3.8	-0.6	-3.16	-2.92	-2.76	-2.72	-0.48	2.4	11.68	-7.632	-54.734	-14.221	-15.35	-10.027
[PyEt+][TFSI-]	C1=CC=[N+](C=C1)CC [S](=O)(=O)([N-][S](=O)(=O)C(F)(F)F)C(F)(F)F	169.278	2.012	0.46	0.107	0.994	0.559	0.22	2.938	3.88	0	1	1.046	0.828	1.44	1	12	15	17.278	195.487	-0.058	-0.031	0.039	-0.022	-0.005	0.006	-0.001	12.556	-2.63	-16.778	-22.63	-0.259	5.704	4.481	0	2.444	-1.407	-3.333	-2.852	0.296	1.037	0.593	0	5.444	-18.907	-22.722	-56.352	1.463	15.565
[4MePyBu+][BF4-]	C1(=CC=[N+](C=C1)CCCC)C [B-](F)(F)(F)F	207.424	1.89	0.791	0.079	0.997	0.796	0.198	7.525	3.88	0	1	1.546	0.969	1.403	1	40	60	15.741	184.29	-0.032	-0.027	0.03	0.004	-0.043	-0.038	0	21.63	1.325	-11.844	-15.769	-14.749	-20.066	-4.14	0.77	3.815	-1.885	-1.263	-1.967	-3.514	-2.708	-1.041	-0.181	5.852	-7.292	-39.708	-31.856	12.189	-5.078
[C2mim+][TFSI-]	C1=[N+](C=C[N]1CC)C [S](=O)(=O)([N-][S](=O)(=O)C(F)(F)F)C(F)(F)F	166.196	2.02	0.516	0.097	0.995	0.651	0.216	3.434	8.81	1	1	1.106	0.874	1.416	2	9	15	17.105	177.35	-0.131	-0.013	0.03	-0.004	0.006	-0.009	-0.004	23.421	0.244	-40.681	-28.601	-3.875	13.163	12.066	0	3.842	-1.097	-5.776	-4.742	-0.798	2.659	1.596	0	11.158	8.41	-66.404	-49.607	-19.094	43.978
[HN222+][TFSI-]	C(C)[N+](CC)(CC)[H] [S](=O)(=O)([N-][S](=O)(=O)C(F)(F)F)C(F)(F)F	202.601	1.905	0.733	0.257	0.966	0.259	0.371	2.086	4.44	0	0	0.671	0.64	1.296	1	3	27	12.217	142.685	-0.139	-0.025	0.079	-0.044	-0.01	0.006	0	4.945	-5.132	-10.866	-10.474	5.308	7.35	0	0	2.692	-2.841	-5.274	-1.361	2.552	1.276	0	0	-6.493	-27.93	-13.531	-74.444	-8.575	0
[4MePyBu+][PF6-]	C1(=CC=[N+](C=C1)CCCC)C [P-](F)(F)(F)(F)(F)F	207.424	1.89	0.791	0.079	0.997	0.796	0.198	7.525	3.88	0	1	1.546	0.969	1.403	1	40	60	15.741	184.29	-0.032	-0.027	0.03	0.004	-0.043	-0.038	0	21.63	1.325	-11.844	-15.769	-14.749	-20.066	-4.14	0.77	3.815	-1.885	-1.263	-1.967	-3.514	-2.708	-1.041	-0.181	5.852	-7.292	-39.708	-31.856	12.189	-5.078
[N2222+][BF4-]	C([N+](CC)(CC)CC)C [B-](F)(F)(F)F	205.004	1.898	1.839	0.645	0.764	0.069	0.845	2.045	0	0	0	1.118	1	1.303	1	6	54	12.31	146.659	-0.045	-0.096	0.049	0.017	-0.013	0.002	0	13.213	-3.149	-26.911	-26.19	13.013	16.438	0	0	6.873	-5.337	-13.184	-3.446	6.293	3.146	0	0	-1.413	6.143	-13.741	-194.59	-13.784	0
[MeImBz+][PF6-]	C1=[N+](C=C[N]1CC2=CC=CC=C2)C [P-](F)(F)(F)(F)(F)F	212.774	1.876	1.069	0.148	0.989	0.561	0.308	6.083	8.81	1	2	2.106	0.911	1.515	2	102	86	19.5	213.439	-0.105	-0.024	0.088	-0.007	-0.014	-0.039	-0.03	19.675	-21.568	-38.805	-0.012	11.675	-8.675	-19.035	2.763	3.448	-4.022	-4.834	-0.643	0.506	-2.429	-2.104	0.976	15.564	-21.445	-110.719	12.164	15.237	-51.796
[C4mim+][BF4-]	C1=[N+](C=C[N]1CCCC)C [B-](F)(F)(F)F	226.762	1.842	0.738	0.084	0.996	0.77	0.206	6.719	8.81	1	1	1.356	0.953	1.395	2	33	53	16.04	173.641	-0.113	-0.024	0.072	0.02	-0.015	-0.026	-0.026	24.6	4.152	-24.554	-18.875	-15.898	-13.547	-3.077	9.984	3.8	-0.6	-3.16	-2.92	-2.76	-2.72	-0.48	2.4	11.68	-7.632	-54.734	-14.221	-15.35	-10.027
[MeImBz+][BF4-]	C1=[N+](C=C[N]1CC2=CC=CC=C2)C [B-](F)(F)(F)F	212.774	1.876	1.069	0.148	0.989	0.561	0.308	6.083	8.81	1	2	2.106	0.911	1.515	2	102	86	19.5	213.439	-0.105	-0.024	0.088	-0.007	-0.014	-0.039	-0.03	19.675	-21.568	-38.805	-0.012	11.675	-8.675	-19.035	2.763	3.448	-4.022	-4.834	-0.643	0.506	-2.429	-2.104	0.976	15.564	-21.445	-110.719	12.164	15.237	-51.796
[Li+][BF4-]	[Li+] [B-](F)(F)(F)F	33.298	3.226	0	1	0	0	1	0	0	0	0	0	1	0	0	0	0	9	637.684	0	0	0	0	0	0	0	0	0	0	0	0	0	0	0	0	0	0	0	0	0	0	0	0	0	0	0	0	0
[P14+][TFSI-]	C1CCC[N+]1(C)CCCC [S](=O)(=O)([N-][S](=O)(=O)C(F)(F)F)C(F)(F)F	249.143	1.789	1.043	0.207	0.978	0.43	0.388	4.026	0	0	0	1.506	0.855	1.333	1	22	64	13.1	155.888	-0.027	-0.131	0.068	0.085	-0.036	-0.042	-0.01	10	-9.333	-22.222	-1.111	-1.667	-4	6.667	5.333	4	-4.333	-6.889	-1.111	-1.667	0	2.333	1.333	9.9	-17	-114.25	-9.22	30.31	27.71
[N3333+][BF4-]	C(CC)[N+](CCC)(CCC)CCC [B-](F)(F)(F)F	271.849	1.742	2.495	0.515	0.857	0.116	0.72	3.868	0	0	0	1.618	0.919	1.312	1	48	198	12.415	151.119	-0.043	-0.147	0.126	0.025	-0.089	0.024	0.003	13.511	-0.59	-4.359	-28.24	-32.024	-1.71	15.933	18.503	7.074	1.078	-5.982	-13.906	-8.952	2.002	7.774	3.887	-1.323	-26.707	4.447	-15.494	-196.119	-9.894
[di(MeO)Im+][PF6-]	C1=[N+](C=C[N]1OC)OC [P-](F)(F)(F)(F)(F)F	157.586	2.053	0.449	0.075	0.997	0.698	0.173	4.16	27.27	3	1	1.095	0.916	1.479	2	51	19	23.056	184.264	0.012	-0.332	-0.056	0.188	-0.029	-0.028	0.007	33	-16.568	-44.765	-17.543	-7.951	-25.469	8.296	28.444	5	0.25	-6.75	-3.75	-3	0.25	1.5	2.25	21.333	12.139	-72.306	-65.306	11.444	-36.833
[Li+][FSI-]	[Li+] [S](=O)(=O)([N-][S](=O)(=O)F)F	33.298	3.226	0	1	0	0	1	0	0	0	0	0	1	0	0	0	0	9	637.684	0	0	0	0	0	0	0	0	0	0	0	0	0	0	0	0	0	0	0	0	0	0	0	0	0	0	0	0	0
[MeImBz+][TFSI-]	C1=[N+](C=C[N]1CC2=CC=CC=C2)C [S](=O)(=O)([N-][S](=O)(=O)C(F)(F)F)C(F)(F)F	212.774	1.876	1.069	0.148	0.989	0.561	0.308	6.083	8.81	1	2	2.106	0.911	1.515	2	102	86	19.5	213.439	-0.105	-0.024	0.088	-0.007	-0.014	-0.039	-0.03	19.675	-21.568	-38.805	-0.012	11.675	-8.675	-19.035	2.763	3.448	-4.022	-4.834	-0.643	0.506	-2.429	-2.104	0.976	15.564	-21.445	-110.719	12.164	15.237	-51.796
[Li+][DFOB-]	[Li+] [B-]1(OC(C(O1)=O)=O)(F)F	33.298	3.226	0	1	0	0	1	0	0	0	0	0	1	0	0	0	0	9	637.684	0	0	0	0	0	0	0	0	0	0	0	0	0	0	0	0	0	0	0	0	0	0	0	0	0	0	0	0	0
[PyBz+][TFSI-]	C1=CC=[N+](C=C1)CC2=CC=CC=C2 [S](=O)(=O)([N-][S](=O)(=O)C(F)(F)F)C(F)(F)F	231.775	1.828	1.203	0.147	0.989	0.642	0.327	8.707	27.67	1	2	2.408	0.956	1.552	2	144	89	22.192	243.626	-0.041	-0.012	0.094	-0.078	-0.027	-0.081	-0.055	12.467	-25.207	-20.207	3.024	10.101	-6.947	2.568	11.266	2.197	-5.925	-3.713	0.402	0.691	-0.499	0.33	-0.3	8.232	-44.629	-61.494	0.083	35.679	-1.223
[N4444+][PF6-]	C([N+](CCCC)(CCCC)CCCC)CCC [P-](F)(F)(F)(F)(F)F	438.025	1.506	3.522	0.452	0.892	0.208	0.709	6.494	0	0	0	2.118	0.991	1.317	1	88	312	12.472	153.558	-0.033	-0.16	0.098	0.12	-0.123	-0.083	0.054	13.673	-5.986	2.834	-5.095	-29.024	-31.972	-5.938	-0.152	7.184	-0.396	1.572	-6.382	-14.337	-8.706	-3.076	2.787	-1.274	-59.777	3.449	3.484	-16.481	-7.506
[Li+][CTf3-]	[Li+] [C-]([S](=O)(=O)C(F)(F)F)([S](C(F)(F)F)(=O)=O)[S](C(F)(F)F)(=O)=O	33.298	3.226	0	1	0	0	1	0	0	0	0	0	1	0	0	0	0	9	637.684	0	0	0	0	0	0	0	0	0	0	0	0	0	0	0	0	0	0	0	0	0	0	0	0	0	0	0	0	0
[PyBz+][PF6-]	C1=CC=[N+](C=C1)CC2=CC=CC=C2 [P-](F)(F)(F)(F)(F)F	231.775	1.828	1.203	0.147	0.989	0.642	0.327	8.707	27.67	1	2	2.408	0.956	1.552	2	144	89	22.192	243.626	-0.041	-0.012	0.094	-0.078	-0.027	-0.081	-0.055	12.467	-25.207	-20.207	3.024	10.101	-6.947	2.568	11.266	2.197	-5.925	-3.713	0.402	0.691	-0.499	0.33	-0.3	8.232	-44.629	-61.494	0.083	35.679	-1.223
[N4444+][BF4-]	C([N+](CCCC)(CCCC)CCCC)CCC [B-](F)(F)(F)F	438.025	1.506	3.522	0.452	0.892	0.208	0.709	6.494	0	0	0	2.118	0.991	1.317	1	88	312	12.472	153.558	-0.033	-0.16	0.098	0.12	-0.123	-0.083	0.054	13.673	-5.986	2.834	-5.095	-29.024	-31.972	-5.938	-0.152	7.184	-0.396	1.572	-6.382	-14.337	-8.706	-3.076	2.787	-1.274	-59.777	3.449	3.484	-16.481	-7.506
[Li+][TDI-]	[Li+] C1(=NC(=C(C#N)[N-]1)C#N)C(F)(F)F	33.298	3.226	0	1	0	0	1	0	0	0	0	0	1	0	0	0	0	9	637.684	0	0	0	0	0	0	0	0	0	0	0	0	0	0	0	0	0	0	0	0	0	0	0	0	0	0	0	0	0
[Li+][TfO-]	[Li+] [S](=O)(=O)(C(F)(F)F)[O-]	33.298	3.226	0	1	0	0	1	0	0	0	0	0	1	0	0	0	0	9	637.684	0	0	0	0	0	0	0	0	0	0	0	0	0	0	0	0	0	0	0	0	0	0	0	0	0	0	0	0	0
[Li+][CF3CO2-]	[Li+] C(C(=O)[O-])(F)(F)F	33.298	3.226	0	1	0	0	1	0	0	0	0	0	1	0	0	0	0	9	637.684	0	0	0	0	0	0	0	0	0	0	0	0	0	0	0	0	0	0	0	0	0	0	0	0	0	0	0	0	0
[Li+][BETI-]	[Li+] [N-]([S](C(C(F)(F)F)(F)F)(=O)=O)[S](C(C(F)(F)F)(F)F)(=O)=O	33.298	3.226	0	1	0	0	1	0	0	0	0	0	1	0	0	0	0	9	637.684	0	0	0	0	0	0	0	0	0	0	0	0	0	0	0	0	0	0	0	0	0	0	0	0	0	0	0	0	0
[4CNPyBz+][TFSI-]	C1(=CC=[N+](C=C1)CC2=CC=CC=C2)C#N [S](=O)(=O)([N-][S](=O)(=O)C(F)(F)F)C(F)(F)F	231.775	1.828	1.203	0.147	0.989	0.642	0.327	8.707	27.67	1	2	2.408	0.956	1.552	2	144	89	22.192	243.626	-0.041	-0.012	0.094	-0.078	-0.027	-0.081	-0.055	12.467	-25.207	-20.207	3.024	10.101	-6.947	2.568	11.266	2.197	-5.925	-3.713	0.402	0.691	-0.499	0.33	-0.3	8.232	-44.629	-61.494	0.083	35.679	-1.223
[4CNPyBz+][PF6-]	C1(=CC=[N+](C=C1)CC2=CC=CC=C2)C#N [P-](F)(F)(F)(F)(F)F	231.775	1.828	1.203	0.147	0.989	0.642	0.327	8.707	27.67	1	2	2.408	0.956	1.552	2	144	89	22.192	243.626	-0.041	-0.012	0.094	-0.078	-0.027	-0.081	-0.055	12.467	-25.207	-20.207	3.024	10.101	-6.947	2.568	11.266	2.197	-5.925	-3.713	0.402	0.691	-0.499	0.33	-0.3	8.232	-44.629	-61.494	0.083	35.679	-1.223
[Li+][BOB-]	[Li+] [B-]12(OC(C(O1)=O)=O)OC(C(O2)=O)=O	33.298	3.226	0	1	0	0	1	0	0	0	0	0	1	0	0	0	0	9	637.684	0	0	0	0	0	0	0	0	0	0	0	0	0	0	0	0	0	0	0	0	0	0	0	0	0	0	0	0	0
[N4444+][TFSI-]	C([N+](CCCC)(CCCC)CCCC)CCC [S](=O)(=O)([N-][S](=O)(=O)C(F)(F)F)C(F)(F)F	438.025	1.506	3.522	0.452	0.892	0.208	0.709	6.494	0	0	0	2.118	0.991	1.317	1	88	312	12.472	153.558	-0.033	-0.16	0.098	0.12	-0.123	-0.083	0.054	13.673	-5.986	2.834	-5.095	-29.024	-31.972	-5.938	-0.152	7.184	-0.396	1.572	-6.382	-14.337	-8.706	-3.076	2.787	-1.274	-59.777	3.449	3.484	-16.481	-7.506
[Li+][PF6-]	[Li+] [P-](F)(F)(F)(F)(F)F	33.298	3.226	0	1	0	0	1	0	0	0	0	0	1	0	0	0	0	9	637.684	0	0	0	0	0	0	0	0	0	0	0	0	0	0	0	0	0	0	0	0	0	0	0	0	0	0	0	0	0
[N1111+][PF6-]	C[N+](C)(C)C [P-](F)(F)(F)(F)(F)F	140.529	2.128	1.299	1	0	0	1	0.752	0	0	0	0.671	1	1.283	1	0	0	12.059	135.905	-0.01	-0.129	0.009	0.048	0	0	0	4.484	-15.592	-8.969	11.958	0	0	0	0	-1.619	-5.419	1.121	1.682	0	0	0	0	-1.633	18.291	-191.087	126.311	0	0
[N1111+][BF4-]	C[N+](C)(C)C [B-](F)(F)(F)F	140.529	2.128	1.299	1	0	0	1	0.752	0	0	0	0.671	1	1.283	1	0	0	12.059	135.905	-0.01	-0.129	0.009	0.048	0	0	0	4.484	-15.592	-8.969	11.958	0	0	0	0	-1.619	-5.419	1.121	1.682	0	0	0	0	-1.633	18.291	-191.087	126.311	0	0
[Li+][TFSI-]	[Li+] [S](=O)(=O)([N-][S](=O)(=O)C(F)(F)F)C(F)(F)F	33.298	3.226	0	1	0	0	1	0	0	0	0	0	1	0	0	0	0	9	637.684	0	0	0	0	0	0	0	0	0	0	0	0	0	0	0	0	0	0	0	0	0	0	0	0	0	0	0	0	0
[Li+][TFSI-]	[Li+] [S](=O)(=O)([N-][S](=O)(=O)C(F)(F)F)C(F)(F)F	33.298	3.226	0	1	0	0	1	0	0	0	0	0	1	0	0	0	0	9	637.684	0	0	0	0	0	0	0	0	0	0	0	0	0	0	0	0	0	0	0	0	0	0	0	0	0	0	0	0	0
[Li+][TFSI-]	[Li+] [S](=O)(=O)([N-][S](=O)(=O)C(F)(F)F)C(F)(F)F	33.298	3.226	0	1	0	0	1	0	0	0	0	0	1	0	0	0	0	9	637.684	0	0	0	0	0	0	0	0	0	0	0	0	0	0	0	0	0	0	0	0	0	0	0	0	0	0	0	0	0
[Li+][TFSI-]	[Li+] [S](=O)(=O)([N-][S](=O)(=O)C(F)(F)F)C(F)(F)F	33.298	3.226	0	1	0	0	1	0	0	0	0	0	1	0	0	0	0	9	637.684	0	0	0	0	0	0	0	0	0	0	0	0	0	0	0	0	0	0	0	0	0	0	0	0	0	0	0	0	0
[Li+][TFSI-]	[Li+] [S](=O)(=O)([N-][S](=O)(=O)C(F)(F)F)C(F)(F)F	33.298	3.226	0	1	0	0	1	0	0	0	0	0	1	0	0	0	0	9	637.684	0	0	0	0	0	0	0	0	0	0	0	0	0	0	0	0	0	0	0	0	0	0	0	0	0	0	0	0	0
[Li+][TFSI-]	[Li+] [S](=O)(=O)([N-][S](=O)(=O)C(F)(F)F)C(F)(F)F	33.298	3.226	0	1	0	0	1	0	0	0	0	0	1	0	0	0	0	9	637.684	0	0	0	0	0	0	0	0	0	0	0	0	0	0	0	0	0	0	0	0	0	0	0	0	0	0	0	0	0
[Li+][TFSI-]	[Li+] [S](=O)(=O)([N-][S](=O)(=O)C(F)(F)F)C(F)(F)F	33.298	3.226	0	1	0	0	1	0	0	0	0	0	1	0	0	0	0	9	637.684	0	0	0	0	0	0	0	0	0	0	0	0	0	0	0	0	0	0	0	0	0	0	0	0	0	0	0	0	0
[Li+][TFSI-]	[Li+] [S](=O)(=O)([N-][S](=O)(=O)C(F)(F)F)C(F)(F)F	33.298	3.226	0	1	0	0	1	0	0	0	0	0	1	0	0	0	0	9	637.684	0	0	0	0	0	0	0	0	0	0	0	0	0	0	0	0	0	0	0	0	0	0	0	0	0	0	0	0	0
[N2222+][BzNNN-]	C([N+](CC)(CC)CC)C C1=CC=CC2=C1[N-]N=N2	205.004	1.898	1.839	0.645	0.764	0.069	0.845	2.045	0	0	0	1.118	1	1.303	1	6	54	12.31	146.659	-0.045	-0.096	0.049	0.017	-0.013	0.002	0	13.213	-3.149	-26.911	-26.19	13.013	16.438	0	0	6.873	-5.337	-13.184	-3.446	6.293	3.146	0	0	-1.413	6.143	-13.741	-194.59	-13.784	0
[truncated: 229 more columns]
